# Supplementary material
Source: publisher figshare collection journal article supplement (https://f1000.figshare.com/ndownloader/files/142947)
Supplement: Supplementary file 1 [file 142947]

0 mM BMAA									1 mM BMAA									3 mM BMAA
Day	Vial 1	Vial 2	Vial 3	Vial 4	Vial 5	Vial 6	Vial 7		Day	Vial 1	Vial 2	Vial 3	Vial 4	Vial 5	Vial 6	Vial 7		Day	Vial 1	Vial 2	Vial 3	Vial 4	Vial 5	Vial 6	Vial 7
1	10	10							1	10	10	10	10	10				1	10	10	10	10	10
5	10	10							5	10	10	9	10	10				5	10	10	9	10	10
6	10	10							6	10	10	9	10	10				6	10	10	9	10	10
7	10	10							7	10	10	9	10	10				7	10	10	9	10	10
8	10	10							8	10	10	9	10	10				8	10	9	9	10	10
9	10	10							9	10	10	9	10	10				9	9	9	9	10	9
10	10	10							10	10	10	8	10	10				10	8	8	9	10	9
11	10	10							11	9	10	8	10	10				11	7	7	9	10	7
12	10	10							12	9	10	8	10	9				12	5	7	8	9	7
13	10	10							13	9	10	8	10	9				13	2	7	7	7	7
14									14	9	10	8	10	9				14	0	4	4	3	5
15									15	9	10	8	10	8				15	0	3	3	3	4
16									16	9	9	6	10	7				16	0	0	0	3	0
17									17	7	9	6	10	6				17	0	0	0	2	0
18									18	7	9	2	9	6				18	0	0	0	0	0
19									19	6	6	1	5	4				19
20									20	5	4	0	1	2				20
21									21									21
22									22									22
23									23									23
24									24									24
25									25									25
26									26									26
27									27									27
28									28									28
29									29									29
30									30									30
5 mM BMAA									10 mM BMAA
Day	Vial 1	Vial 2	Vial 3	Vial 4	Vial 5	Vial 6	Vial 7		Day	Vial 1	Vial 2	Vial 3	Vial 4	Vial 5	Vial 6	Vial 7
1	10	10	10	10	10				1	10
5	10	10	9	10	9				5	3
6	10	10	9	10	8				6	0
7	9	10	8	10	7				7
8	7	8	5	10	5				8
9	6	8	4	7	4				9
10	4	7	3	4	1				10
11	3	6	2	3	0				11
12	2	3	2	3	0				12
13	1	3	1	1	0				13
14	1	1	1	1	0				14
15	1	0	0	0	0				15
16	0	0	0	0	0				16
17									17
18									18
19									19
20									20
21									21
22									22
23									23
24									24
25									25
26									26
27									27
28									28
29									29
30									30
